# Supplementary material for: A predictive classifier of poor prognosis in transplanted patients with juvenile myelomonocytic leukemia: a study on behalf of the Société Francophone de Greffe de Moelle et de Thérapie Cellulaire
Source: PubMed Central journal article supplement — Haematologica. 2024 Feb 22;109(9):2908–19. doi: 10.3324/haematol.2023.284103 (PMC11367243; doi:10.3324/haematol.2023.284103), 2024-02-22

# A predictive classifier of poor prognosis in transplanted patients with juvenile myelomonocytic leukemia: a study on behalf of the Société Francophone de Greffe de Moelle et de Thérapie Cellulaire

Déborah Meyran,<sup>1,2,3</sup> Chloé Arfeuille,<sup>4,5</sup> Sylvie Chevret,<sup>6</sup> Quentin Neven,<sup>1</sup> Aurélie Caye-Eude,<sup>4</sup> Elodie Lainey,<sup>5,7</sup> Arnaud Petit,<sup>8</sup> Fanny Riolland,<sup>9</sup> Gérard Michel,<sup>10</sup> Dominique Plantaz,<sup>11</sup> Charlotte Jubert,<sup>12</sup> Alexandre Theron,<sup>13,14</sup> Virginie Gandemer,<sup>15</sup> Marie Ouachée-Chardin,<sup>16</sup> Catherine Paillard,<sup>17</sup> Bénédicte Bruno,<sup>18</sup> Nimrod Buchbinder,<sup>19</sup> Cécile Pochon,<sup>20</sup> Charlotte Calvo,<sup>1</sup> Mony Fahd,<sup>1</sup> André Baruchel,<sup>1,21</sup> Hélène Cavé,<sup>4,5</sup> Jean-Hugues Dalle<sup>1,21</sup> and Marion Strullu<sup>1,5</sup>

<sup>1</sup>Service d'Héματο-Immunologie Pédiatrique, Hôpital Robert Debré, GHU AP-HP Nord-Université Paris Cité, Paris, France; <sup>2</sup>Children's Cancer Centre, Royal Children's Hospital, Parkville, Victoria, Australia; <sup>3</sup>Sir Peter MacCallum Department of Oncology, University of Melbourne, Melbourne, Australia; <sup>4</sup>Service de Génétique Moléculaire, Hôpital Robert Debré, GHU AP-HP Nord-Université Paris Cité, Paris, France; <sup>5</sup>INSERM UMR\_S1131, Institut Universitaire d'Hématologie, Université Paris Cité, Paris-Cité, Paris, France; <sup>6</sup>Service de Biostatistique et Information Médicale, Hôpital Saint Louis, GHU AP-HP Nord-Université Paris Cité, Paris, France; <sup>7</sup>Service d'Hématologie Biologique, Hôpital Robert Debré, GHU AP-HP Nord-Université Paris Cité, Paris, France; <sup>8</sup>Service d'Hématologie Pédiatrique, Hôpital Armand Trousseau, Université Paris Sorbonne, Paris, France; <sup>9</sup>Service d'Onco-Hématologie Pédiatrique, CHU de Nantes, Nantes, France; <sup>10</sup>Service d'Hématologie Pédiatrique, Assistance Publique des Hôpitaux de Marseille AP-HM, Marseille, France; <sup>11</sup>Service d'Onco-Hématologie Pédiatrique, CHU de Grenoble, Grenoble, France; <sup>12</sup>CHU Bordeaux, Service d'Hématologie Oncologie Pédiatrique, F-33000 Bordeaux, France; <sup>13</sup>Department of Pediatric Oncology and Hematology, CHU CHU Montpellier, Montpellier, France; <sup>14</sup>IRMB, University of Montpellier, INSERM, Montpellier, France; <sup>15</sup>Service d'Onco-Hématologie Pédiatrique, CHU de Rennes, Rennes, France; <sup>16</sup>Service d'Onco-Hématologie Pédiatrique, IHOPE, Lyon, France; <sup>17</sup>Service de Pédiatrie, Hôpital de Hautepierre, Strasbourg, France; <sup>18</sup>Service de Pédiatrie, Hôpital de Jeanne de Flandre, Lille, France; <sup>19</sup>Service d'Onco-Hématologie Pédiatrique, CHU de Rouen, Rouen, France; <sup>20</sup>Service d'Onco-Hématologie Pédiatrique, Hôpital d'Enfants de Brabois, Vandoeuvre lès Nancy, France and <sup>21</sup>Unité Inserm U976, Université Paris Cité, Paris-Cité, Paris, France

**Correspondence:** M. Strullu  
[marion.strullu@aphp.fr](mailto:marion.strullu@aphp.fr)

**Received:** August 17, 2023.  
**Accepted:** February 13, 2024.  
**Early view:** February 22, 2024.

<https://doi.org/10.3324/haematol.2023.284103>

©2024 Ferrata Storti Foundation

Published under a CC BY-NC license

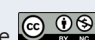

## Supplemental Methods

Both bone marrow and peripheral stem cell donors underwent 4-digit molecular typing for HLA A, B, C, DR, and DQ subtypes, while cord blood (CB) had class 1 HLA typing (A and B subtypes) conducted via the serologic method, and class 2 (DR) typing performed using 4-digit molecular methods. Compatibility was defined as a 10 out of 10 HLA match for both matched sibling donors (MSD) and matched unrelated donors (MUD), and a 6 out of 6 matches for CB. Less than either 10 or 6 was classified as mismatched. Neutrophil engraftment was defined as absolute neutrophil count  $\geq 0.5 \times 10^9/L$  for 3 consecutive days and platelet engraftment as platelet count  $\geq 50 \times 10^9/L$  for 7 consecutive days, without transfusion. Graft failure was defined as either the absence of hematopoietic reconstitution of donor origin on day 60 (primary graft failure) or a loss of donor cells after transient donor engraftment (secondary graft failure)<sup>7</sup>. Full donor chimerism was defined as  $>95\%$  of donor cells and mixed donor chimerism between 5 and 95%.

### Supplemental Table 1: Conditioning regimen

| Conditioning regimen                             | n  |
|--------------------------------------------------|----|
| Busulfan-Fludarabine-Melphalan (Bu/Flu/Mel)      | 46 |
| Busulfan-Cyclophosphamide-Melphalan (Bu/Cy/Mel)  | 41 |
| Busulfan-Cyclophosphamide                        | 17 |
| Busulfan-Fludarabine-Thiothepa                   | 9  |
| TBI-Cyclophosphamide-Fludarabine                 | 2  |
| Busulfan-Cyclophosphamide-Clofarabine-Cytarabine | 1  |
| Busulfan-Fludarabine-Cyclophosphamide            | 1  |
| Busulfan-Cyclophosphamide-Melphalan-Etoposide    | 1  |
| TBI-Etoposide                                    | 1  |

TBI, total body irradiation. Busulfan was given orally (n=14, before October 2005) or intravenously (n=102, since November 2005)

**Supplemental Table 2: Graft-versus-host disease prophylaxis according to donor.**

|                                 | <b>Identical sibling,<br/>n=24</b> | <b>Matched unrelated,<br/>n=46</b> | <b>Mismatched unrelated,<br/>n=45</b> | <b>Haploidentical,<br/>n=4</b> |
|---------------------------------|------------------------------------|------------------------------------|---------------------------------------|--------------------------------|
| <b>CSA</b>                      | 19                                 | 4                                  | 10                                    | 0                              |
| <b>CSA/corticosteroids</b>      | 0                                  | 8                                  | 19                                    | 0                              |
| <b>CSA/MTX</b>                  | 4                                  | 31                                 | 6                                     | 1                              |
| <b>CSA/MMF</b>                  | 0                                  | 2                                  | 7                                     | 1                              |
| <b>CSA/MTX/sirolimus</b>        | 0                                  | 0                                  | 1                                     | 0                              |
| <b>CSA/MTX/tacrolimus</b>       | 0                                  | 1                                  | 1                                     | 0                              |
| <b>CSA/MMF/Cyclophosphamide</b> | 0                                  | 0                                  | 0                                     | 2                              |
| <b>Missing</b>                  | 1                                  | 0                                  | 1                                     | 0                              |

**Supplemental Table 3: Patients characteristics of according to engraftment status**

|                                       | Engraftment, n=100 | No/lost engraftment, n=16 |
|---------------------------------------|--------------------|---------------------------|
| <b>M/F ratio</b>                      | 2.3                | 1.6                       |
| <b>Pre-HSCT treatment, no. (%)</b>    | n=99               |                           |
| <b>No or low-dose chemotherapy</b>    | 73                 | 14 (87.5)                 |
| <b>AML-type chemotherapy</b>          | 26                 | 2 (12.5)                  |
| <b>Splenectomy</b>                    | 2                  | 3 (18.7)                  |
| <b>RAS-pathway mutations, no. (%)</b> | n=99               |                           |
| <b><i>PTPN11</i></b>                  | 42                 | 4 (25.0)                  |
| <b><i>KRAS</i></b>                    | 21                 | 5 (31.2)                  |
| <b><i>NRAS</i></b>                    | 19                 | 3 (18.7)                  |
| <b><i>CBL</i></b>                     | 4                  | 3 (18.7)                  |
| <b><i>NF1</i></b>                     | 6                  | 1 (6.2)                   |
| <b>Other</b>                          | 4                  | 0                         |
| <b>No mutation</b>                    | 3                  | 0                         |
| <b>Donor, no. (%)</b>                 |                    |                           |
| <b>Match siblings</b>                 | 21                 | 2 (12.5)                  |
| <b>Haploidentical</b>                 | 3                  | 1 (6.2)                   |
| <b>Match unrelated</b>                | 42                 | 4 (25.0)                  |
| <b>Mismatched unrelated</b>           | 34                 | 9 (56.2)                  |
| <b>Source of cells, no. (%)</b>       |                    |                           |
| <b>Cord blood</b>                     | 29                 | 8 (50.0)                  |
| <b>Bone marrow</b>                    | 62                 | 7 (43.7)                  |
| <b>Peripheral blood</b>               | 9                  | 1 (6.2)                   |
| <b>Conditioning, no. (%)</b>          |                    |                           |
| <b>Bu/Cy/Mel</b>                      | 37                 | 2 (12.5)                  |
| <b>Bu/Flu/Mel</b>                     | 42                 | 3 (18.7)                  |
| <b>Other</b>                          | 21                 | 11 (68.7)                 |

HSCT, hematopoietic stem cell transplant; AML, acute myeloid leukemia; HbF, fetal hemoglobin; Bu/Cy/Mel, busulfan/cyclophosphamide/melphalan; Bu/Flu/Mel, busulfan/fludarabine/melphalan;

**Supplementary Table 4:** Univariable predictive analyses of GVHD based on Fine & Gray models

| Outcomes                                    | Acute GVHD 2–4          | Acute GVHD 3–4           | Chronic GVHD            |
|---------------------------------------------|-------------------------|--------------------------|-------------------------|
|                                             | 100-day CI, 95%CI       | 100-day CI, 95%CI        | 36-month CI, 95%CI      |
| <b>Overall</b>                              | 53.8%, 44.4-62.3        | 31.9%, 23.7-40.4         | 36.0%, 27.2-44.9        |
| <b>Patient characteristics at diagnosis</b> |                         |                          |                         |
| <b>Age ≥ 2 years at diagnosis</b>           | 1.14 (0.70-1.84)        | 1.02 (0.64-1.71)         | 0.86 (0.47-1.59)        |
| <b>Platelets ≥ 33 x10<sup>9</sup>/L</b>     | 0.82 (0.47-1.43)        | 0.57 (0.24-1.35)         | 0.93 (0.44-1.96)        |
| <b>Monocyte &gt;7.2 x10<sup>9</sup>/L</b>   | 0.88 (0.49-1.56)        | 0.88 (0.47-1.63)         | 0.86 (0.41-1.80)        |
| <b>Myeloid precursors in PB</b>             | 1.45 (0.50-4.16)        | 0.72 (0.25-2.03)         | 0.95 (0.38-2.39)        |
| <b>BM blasts ≥5%</b>                        | 1.36 (0.84-2.21)        | 1.39 (0.74-2.62)         | 1.13 (0.61-2.07)        |
| <b>Pre-HSCT BM ≥5%</b>                      | 1.45 (0.88-2.39)        | 1.16 (0.68-2.00)         | 1.19 (0.64-2.23)        |
| <b>Elevated HbF*</b>                        | <b>0.52 (0.30-0.90)</b> | 0.75 (0.37-1.51)         | 0.73 (0.35-1.52)        |
| <b>Abnormal karyotype</b>                   | 1.25 (0.76-2.05)        | 0.85 (0.44-1.63)         | 0.87 (0.47-1.62)        |
| <b>Monosomy 7</b>                           | 1.08 (0.62-1.89)        | 0.61 (0.25-1.46)         | 1.10 (0.54-2.24)        |
| <b>RAS-pathway mutations</b>                |                         |                          |                         |
| <i>PTPN11</i>                               | 1.00                    | 1.00                     | 1.00                    |
| <i>CBL</i>                                  | 0.15 (0.02-1.24)        | 0.79 (0.13-4.75)         | 0.14 (0.02-1.13)        |
| <i>KRAS</i>                                 | 0.65 (0.25-1.70)        | 0.75 (0.19-2.92)         | <b>0.22 (0.07-0.64)</b> |
| <i>NF1</i>                                  | 0.82 (0.25-2.70)        | 1.10 (0.22-5.47)         | <b>0.11 (0.01-0.91)</b> |
| <i>NRAS</i>                                 | 1.10 (0.43-2.82)        | <b>3.44 (1.01-11.78)</b> | 0.40 (0.14-1.13)        |
| <i>No/other</i>                             | 0.62 (0.25-1.52)        | 1.77 (0.54-5.88)         | <b>0.38 (0.15-0.96)</b> |
| <b>Additional alteration**</b>              | 1.30 (0.78-2.16)        | 0.80 (0.42-1.51)         | 0.99 (0.52-1.87)        |
| <b>Pre-HSCT treatment</b>                   |                         |                          |                         |
| <b>No</b>                                   | 1.00                    | 1.00                     | 1.00                    |
| <b>Low-dose chemotherapy</b>                | 0.90 (0.38-2.09)        | 0.71 (0.27-1.90)         | 1.37 (0.40-4.70)        |
| <b>AML-type chemotherapy</b>                | 0.95 (0.38-2.35)        | 0.84 (0.29-2.44)         | 2.25 (0.62-8.13)        |
| <b>Transplant characteristics</b>           |                         |                          |                         |
| <b>Female recipient sex</b>                 | 1.24 (0.75-2.05)        | 1.50 (0.80-2.84)         | 1.52 (0.82-2.82)        |
| <b>Female donor to male recipient</b>       | 1.18 (0.63-2.20)        | 1.11 (0.51-2.44)         | 0.89 (0.45-1.75)        |
| <b>Age ≥ 2 years at HSCT</b>                | 1.03 (0.63-1.68)        | 1.36 (0.70-2.65)         | 1.05 (0.56-1.97)        |
| <b>Time to HSCT ≥ 6 months</b>              | 1.25 (0.76-2.04)        | 1.25 (0.66-2.35)         | 1.02 (0.55-1.87)        |
| <b>Donor</b>                                |                         |                          |                         |
| <b>Identical sibling</b>                    | 1.00                    | 1.00                     | 1.00                    |
| <b>Matched unrelated</b>                    | 1.14 (0.56-2.29)        | 1.05 (0.42-2.66)         | 1.56 (0.60-4.07)        |
| <b>Mismatched relative</b>                  | 0.80 (0.22-2.95)        | 1.53 (0.40-5.91)         | <b>3.24 (1.02-10.3)</b> |
| <b>Mismatch unrelated</b>                   | 0.99 (0.48-2.02)        | 1.02 (0.40-2.56)         | 1.26 (0.47-3.39)        |
| <b>HLA disparities ≥ 2</b>                  | 0.69 (0.41-1.16)        | 0.81 (0.42-1.56)         | 0.87 (0.45-1.66)        |
| <b>Cord Blood source</b>                    | 0.63 (0.37-1.08)        | 0.65 (0.32-1.30)         | 0.62 (0.30-1.26)        |
| <b>Donor/recipient CMV status</b>           |                         |                          |                         |
| <b>Negative/Negative</b>                    | 1.00                    | 1.00                     | 1.00                    |
| <b>Negative/Positive</b>                    | 0.70 (0.31-1.58)        | 0.69 (0.26-1.84)         | 0.64 (0.24-1.69)        |
| <b>Positive/Negative</b>                    | <b>1.64 (1.00-2.71)</b> | 1.00 (0.43-2.18)         | 0.78 (0.32-1.90)        |
| <b>Positive/Positive</b>                    | 0.65 (0.29-1.45)        | 0.81 (0.33-2.00)         | 0.78 (0.31-1.98)        |
| <b>Conditioning</b>                         |                         |                          |                         |
| <b>Other</b>                                | 1.00                    | 1.00                     | 1.00                    |
| <b>Bu/Cy/Mel</b>                            | 1.24 (0.65-2.36)        | 0.79 (0.33-1.90)         | 0.96 (0.46-2.03)        |
| <b>Bu/Flu/Mel</b>                           | 1.40 (0.76-2.58)        | 1.32 (0.62-2.78)         | 0.79 (0.37-1.70)        |
| <b>Anti-thymoglobulin</b>                   | 0.69 (0.42-1.12)        | 0.52 (0.27-1.02)         | 0.78 (0.42-1.45)        |

NA refers to the models that do not converge due to a low number of events in one stratum. Significant results are in bold letters.

\* For patients ≥6 months,

\*\* At least 1 alteration among the following genes: *ASXL1*, *JAK3*, *SETBP1*, or double RAS mutation or karyotype anomaly.

GVHD, graft-versus-host disease; HSCT, hematopoietic stem cell transplantation; BM, bone marrow; HbF, fetal hemoglobin; AML, acute myeloid leukemia; Bu/Cy/Mel, busulfan/cyclophosphamide/melphalan; Bu/Flu/Mel, busulfan/fludarabine/melphalan.

**Supplementary Table 5:** Univariable predictive analyses of the “stringent” EFS when additionally including beside relapses and deaths, secondary malignancies and secondary allografts as events

| Outcomes                                               | “Stringent” EFS |                                      |
|--------------------------------------------------------|-----------------|--------------------------------------|
|                                                        | No. of patients | 60-month event-free survival, 95% CI |
| <b>Overall</b>                                         | 119             | 63.6%, 55.3-73.3                     |
| <b>No. of events</b>                                   |                 | 46 events                            |
| <b>Patient characteristics at diagnosis</b>            |                 |                                      |
| <b>Age <math>\geq</math> 2 years</b>                   | 55              | <b>2.62 (1.42-4.82)</b>              |
| <b>Platelet <math>\geq</math> 33 x10<sup>9</sup>/L</b> | 28              | 0.93 (0.46-1.88)                     |
| <b>Monocyte &gt; Q3 (7.2 x10<sup>9</sup>/L)</b>        | 30              | <b>1.92 (1.05-3.53)</b>              |
| <b>Myeloid precursors in PB</b>                        | 106             | 2.24 (0.54-9.26)                     |
| <b>BM blasts <math>\geq</math>5%</b>                   | 49              | 0.98 (0.54-1.76)                     |
| <b>Elevated HbF*</b>                                   | 73/88           | 1.11 (0.53-2.31)                     |
| <b>Abnormal karyotype</b>                              |                 | 1.28 (0.71-2.32)                     |
| <b>Monosomy 7</b>                                      | 26              | 0.67 (0.31-1.44)                     |
| <b>RAS-pathway mutations</b>                           |                 |                                      |
| <i>PTPN11</i>                                          | 46              | 1.00                                 |
| <i>CBL</i>                                             | 7               | 1.37 (0.27-6.78)                     |
| <i>KRAS</i>                                            | 26              | 0.56 (0.14-2.24)                     |
| <i>NF1</i>                                             | 8               | 2.14 (0.51-8.99)                     |
| <i>NRAS</i>                                            | 23              | 1.47 (0.40-5.34)                     |
| <i>No/other</i>                                        | 9               | 1.24 (0.37-4.18)                     |
| <b>Additional mutations</b>                            |                 |                                      |
| <i>JAK3</i>                                            | 10              | 1.67 (0.70-3.95)                     |
| <i>SETBP1</i>                                          | 9               | 1.93 (0.81-4.56)                     |
| <i>ASXL1</i>                                           | 11              | 0.90 (0.32-2.50)                     |
| <b>Double RAS pathway mutation</b>                     | 25              | 1.22 (0.62-2.40)                     |
| <b>Additional alteration**</b>                         |                 |                                      |
| <b><math>\geq</math>1 Alteration</b>                   | 67              | 1.59 (0.83-3.03)                     |
| <b><math>\geq</math>2 Alterations</b>                  | 20              | 1.33 (0.66-2.68)                     |
| <b>Pre-HSCT treatment</b>                              |                 |                                      |
| <b>Low-dose chemotherapy</b>                           | 77              | 1.00                                 |
| <b>No chemotherapy</b>                                 | 13              | 0.30 (0.07-1.25)                     |
| <b>AML-type chemotherapy</b>                           | 28              | 0.88 (0.45-1.75)                     |
| <b>Transplant characteristics</b>                      |                 |                                      |
| <b>Male recipient sex</b>                              | 82              | 0.88 (0.48-1.64)                     |
| <b>Female donor to male recipient</b>                  | 28              | 1.40 (0.73-2.68)                     |
| <b>Age <math>\geq</math> 2 years at HSCT</b>           | 71              | <b>2.28 (1.18-4.41)</b>              |
| <b>Pre-HSCT BM <math>\geq</math>5%</b>                 | 42              | 0.84 (0.45-1.55)                     |
| <b>Time to HSCT <math>\geq</math> 6 months</b>         | 52              | 1.46 (0.82-2.61)                     |
| <b>Donor</b>                                           |                 |                                      |
| <b>Geno-Identical sibling</b>                          | 24              | 1.00                                 |
| <b>Matched unrelated</b>                               | 46              | 0.60 (0.27-1.32)                     |
| <b>Mismatched relative</b>                             | 4               | 0.50 (0.06-3.89)                     |
| <b>Mismatch unrelated</b>                              | 45              | 1.00 (0.48-2.09)                     |
| <b>HLA disparities <math>\geq</math> 2</b>             | 40              | 1.11 (0.61-2.03)                     |
| <b>Stem cells</b>                                      |                 |                                      |
| <b>Bone marrow</b>                                     | 70              | 1.00                                 |
| <b>Cord blood</b>                                      | 39              | 1.07 (0.58-1.97)                     |
| <b>Peripheral blood</b>                                | 10              | 0.48 (0.11-2.01)                     |
| <b>Donor/recipient CMV status</b>                      |                 |                                      |
| <b>Negative/Negative</b>                               | 57              | 1.00                                 |



|                           |    |                         |
|---------------------------|----|-------------------------|
| Negative/Positive         | 19 | 1.43 (0.64-3.19)        |
| Positive/Negative         | 19 | 1.32 (0.55-3.16)        |
| Positive/Positive         | 20 | 1.92 (0.86-4.29)        |
| <b>Conditioning</b>       |    |                         |
| Bu/Cy/Mel                 | 41 | 1.00                    |
| Bu/Flu/Mel                | 46 | 0.87 (0.42-1.83)        |
| Other                     | 32 | <b>2.04 (1.03-4.05)</b> |
| <b>Anti-thymoglobulin</b> | 57 | 0.93 (0.52-1.66)        |

\* For patients  $\geq 6$  months,

\*\* At least 1 alteration among the following genes: *ASXL1*, *JAK3*, *SETBP1*, or double RAS mutation or karyotype anomaly.

NA refers to the models that do not converge due to a too low number of events in one stratum. Significant results are in bold letters.

EFS, event free survival; HSCT, hematopoietic stem cell transplantation; CB, cord blood; BM, bone-marrow; PB, peripheral blood; CMV, cytomegalovirus; Bu/Cy/Mel, busulfan/cyclophosphamide/melphalan; Bu/Flu/Mel, busulfan/fludarabine/melphalan.

**Supplementary Table 6:** Characteristics of patients at diagnosis according to monocyte count in peripheral blood

|                                                                        | <b>AMC &gt;7.2G/L<br/>n=30</b> | <b>AMC ≤7.2G/L<br/>n=89</b> | <b>p-value</b> |
|------------------------------------------------------------------------|--------------------------------|-----------------------------|----------------|
| <b>M/F (ratio)</b>                                                     | 22/8 (2.75)                    | 60/29 (2.1)                 | 0.65           |
| <b>Age at diagnosis, median [IQR]</b>                                  | 1.7 [0.7-3.1]                  | 1.6 [0.8-3.3]               | 0.50           |
| <b>Peripheral blood cell count, median [IQR]<br/>x10<sup>9</sup>/L</b> |                                |                             |                |
| <b>White blood cells</b>                                               | 59.2 [40.0-73.0]               | 21.6 [14-29.2]              | <0.0001        |
| <b>Platelets &lt;33 x10<sup>9</sup>/L, n (%)</b>                       | 9/29 (31.0)                    | 19/87 (21.8)                | 0.33           |
| <b>Platelets</b>                                                       | 53 [28-107]                    | 60 [34-113]                 | 0.82           |
| <b>Hemoglobin, g/dl</b>                                                | 8.8 [7.2-10.1]                 | 9.1 [8.1-10.4]              | 0.36           |
| <b>Neutrophils</b>                                                     | 17.7 [6.3-31.0]                | 6.9 [3.5-10.6]              | 0.0002         |
| <b>Eosinophils</b>                                                     | 0.7 [0-1.8]                    | 0.27 [0.06-0.64]            | 0.22           |
| <b>Basophils</b>                                                       | 0.5 [0.3-0.9]                  | 0.27 [0.06-0.41]            | 0.14           |
| <b>Lymphocytes</b>                                                     | 13.3 [9.1-19.4]                | 6.3 [4.7-10.1]              | <0.0001        |
| <b>BM Blasts %, median [IQR]</b>                                       | 5.2 [3.6-11.5]                 | 3.5 [2.0-7.0]               | 0.008          |
| <b>Elevated HbF*, no. (%)</b>                                          | 19/25 (76.0)                   | 64/79 (81.0)                | 0.58           |
| <b>RAS-pathway mutations, no. (%)</b>                                  |                                |                             |                |
| <b>PTPN11</b>                                                          | 10 (33.3)                      | 37 (41.6)                   | 0.28           |
| <b>KRAS</b>                                                            | 5 (16.7)                       | 21 (23.6)                   |                |
| <b>NRAS</b>                                                            | 6 (20)                         | 17 (19.1)                   |                |
| <b>CBL</b>                                                             | 2 (6.7)                        | 5 (5.6)                     |                |
| <b>NF1</b>                                                             | 5 (16.7)                       | 3 (3.4)                     |                |
| <b>Other</b>                                                           | 0                              | 4 (4.5)                     |                |
| <b>No mutation</b>                                                     | 1 (3.3)                        | 2 (2.2)                     |                |
| <b>Abnormal karyotype, n (%)</b>                                       | 12/29 (41.4)                   | 33/84 (39.3)                | 1.00           |
| <b>Additional mutations, no. (%)</b>                                   |                                |                             |                |
| <b>JAK3</b>                                                            | 3/29 (10.3)                    | 7/85 (8.2)                  | 0.71           |
| <b>SETBP1</b>                                                          | 3/29 (10.3)                    | 6/85 (7.1)                  | 0.69           |
| <b>ASXL1</b>                                                           | 1/29 (3.4)                     | 10/85 (11.7)                | 0.28           |
| <b>Double RAS pathway mutation</b>                                     | 6/29 (20.7)                    | 19/85 (22.3)                | 1.00           |
| <b>≥ 1 additional alteration**, n (%)</b>                              | 18/29 (62.1)                   | 51/82 (62.2)                | 1.00           |
| <b>≥ 2 additional alterations**, n (%)</b>                             | 6/29 (20.7)                    | 14/82 (17.0)                | 0.78           |

IQR, interquartile range; HbF, fetal hemoglobin; BM, Bone marrow.

\* for patients ≥6 months; \*\* At least 1 or 2 alteration among the following genes: *ASXL1*, *JAK3*, *SETBP1*, or double RAS mutation or karyotype anomaly.

**Supplementary Table 7: Patient characteristics and outcomes following HSCT in main studies published in JMML**

| Reference               | HSCT period | N° of pts | RAS mut (%) | Time to HSCT (months) | PB/CB/BM (%) | HLA disparity ≥1 (%) | URD (%) | Conditioning (%)                                                     | Graft failure (%) | 5-y EFS (%) | Risk factors for EFS                                                              | 5-y OS (%) | Risk factors for OS                                | 5-y TRM (%) | Risk factors for TRM                               | 5-y RI (%) | Risk factors for RI                                                       |
|-------------------------|-------------|-----------|-------------|-----------------------|--------------|----------------------|---------|----------------------------------------------------------------------|-------------------|-------------|-----------------------------------------------------------------------------------|------------|----------------------------------------------------|-------------|----------------------------------------------------|------------|---------------------------------------------------------------------------|
| Smith et al, 2002       | 1990-1997   | 46        | NA          | 8,7                   | NA           | 37                   | 100     | TBI-based (76), Bu-Cy (11), Bu-Cy-Mel (13)                           | 4                 | 24 (2y)     | no                                                                                | 42 (2y)    | no                                                 | 18 (2y)     | NA                                                 | 58 (2y)    | no                                                                        |
| Manabe et al, 2002      | 1990-1997   | 27        | NA          | 9                     | 11/4/85      | 19                   | 41      | TBI-based (67), Bu-Cy-based (22), Others (11)                        | 4                 | 54 (4y)     | NA                                                                                | 58 (4y)    | Abn karyotype, age>1y                              | NA          | NA                                                 | NA         | NA                                                                        |
| Locatelli et al, 2005   | 1993-2002   | 100       | NA          | 6                     | 14/7/79      | NA                   | 52      | Bu-Cy-Mel (100)                                                      | 5                 | 52          | age at dg≥24y, age at HSCT ≥4y, female sex                                        | 64         | NA                                                 | 13          | female donor                                       | 35         | age at HSCT ≥4y, female sex, age at dg≥4y, HbF≥40%, blast BM at HSCT≥20%. |
| Locatelli et al, 2013   | 1995-2010   | 110       | NA          | 5,6                   | 0/100/0      | 84                   | 100     | Bu-Cy-Mel (45), TBI-based (17), RIC (7), Others (41)                 | 18                | 44          | Age at dg>1.4y, monosomy 7, HLA MM≥2                                              | 52         | Age at dg >1.4y, monosomy 7, AML-type chemotherapy | 22          | monosomy 7, female sex, no chemotherapy, HSCT<2003 | 33         | Age at dg >1.4y                                                           |
| Stieglitz et al, 2015   | 2001-2006   | 44        | NA          | 1.8                   | NA           | NA                   | 50      | TBI-Cy (100)                                                         | 4                 | 39          | NA                                                                                | 57         | NA                                                 | 7           | NA                                                 | 43         | NA                                                                        |
| Yabe et al, 2015        | 2001-2011   | 30        | 67          | 6                     | 7/17/77      | 43                   | 73      | Bu-Flu-Mel (100)                                                     | 20                | 53          | HLA MM                                                                            | 72         | NA                                                 | NA          | NA                                                 | NA         | NA                                                                        |
| Dvorak et al, 2018      | 2013-2015   | 15        | 100         | 1.2 to 1.4            | 7/7/87       | 13                   | 67      | Bu-Cy-Mel (40), Bu-Flu (60)                                          | 7                 | 47 (1.5y)   | NA                                                                                | 64 (1.5y)  | NA                                                 | NA          | NA                                                 | NA         | NA                                                                        |
| Lin et al, 2019         | 2010-2018   | 47        | 94          | 4 to 4.4              | 9/1/0/9      | 60                   | 26      | Bu-Cy-based (43), Bu-Cy-VP16-based (53), Others (4)                  | 4                 | 55          | Age at dg>2.6y                                                                    | 64         | NA                                                 | 11          | NA                                                 | 35         | HLA MM<2, Age>2.6y, PTPN11, KRAS, NRAS                                    |
| Yoshida et al, 2020     | 2000-2011   | 129       | NA          | 6                     | 8/23/69      | 48                   | 66      | Bu-Flu-Mel (46), Bu-Cy (23), other MAC (6), RIC (10), TBI-based (16) | 12                | 46          | Age at HSCT≥2y, Abn karyotype, interval dg-HSCT>6 months, HSCT<2005, HLA MM≥2, CB | 64         | Abn karyotype, HSCT<2005, HLA MM≥2, TBI            | 14          | TBI                                                | 34         | age at HSCT≥2y, Abn karyotype, CB, HLA MM≥2                               |
| Eun Sang Yi et al, 2023 | 2000-2019   | 68        | 74          | NA                    | 61/22/16     | 54                   | 65      | Bu-Flu or Bu-Mel-based (43), Bu-Cy-based (48), TBI-based (9)         | 10                | 53          | HbF≥40%, no NRAS mutation                                                         | 62         | NA                                                 | 30          | NA                                                 | 26         | HbF≥40%, Abn karyotype, MSD                                               |

In bold, variables significant in multivariate analysis

HSCT, hematopoietic stem cell transplantation; CB, cord blood; BM, bone-marrow; PB, peripheral blood; URD: unrelated donor; EFS, event free survival; OS, overall survival; TRM, treatment related mortality; RI, relapse incidence; NA, not available; TBI, total body irradiation; Bu, busulfan; Cy, cyclophosphamide; Mel, melphalan; Flu, fludarabine; RIC, reduced intensity conditioning; Dg, diagnostic; HLA MM, HLA mismatch; Abn, abnormal; HbF, fetal hemoglobin; MSD, matched sibling donor

## **Supplemental Figure legends**

### **Supplemental figure 1: Pretransplant strategy according to the initiating RAS-mutation**

**and effect of pre-HSCT treatment on BM blast percentage.** (A) Time from JMML diagnosis to transplant (months, IQR) according to the initiating RAS mutation, n=118. (B) Pre-HSCT chemotherapy intensity according to the initiating RAS mutation, n=118. (C) BM blast (%) at JMML diagnosis (n=118) and prior to HSCT (n=88) according to the pre-HSCT chemotherapy received. Diagnostic BM blast count in patients with AML-type, low-dose, and no chemotherapy (10.8%, 4.5% and 4.2%, respectively). Pre-HSCT blasts count in patients with AML-type, low-dose, and no chemotherapy (4.3%, 5.7% and 2.8%, respectively). AML, acute myeloid leukemia; Dg, diagnostic; HSCT, hematopoietic stem cell transplant; BM, bone marrow.

**Supplemental figure 2: Outcome of the 16 patients who failed to engraft.** HSCT, hematopoietic stem cell transplant; JMML, juvenile myelomonocytic leukemia.

**Supplemental figure 2: GvHD and impact on JMML Relapse.** Cumulative Incidence for grade 2-4 acute GvHD (A), and for chronic GvHD (B). Relapse-free survival according to the presence or absence of grade 2-4 acute GvHD (C) and Relapse-free survival according to the presence or absence of chronic GvHD (D) were analyzed using Kaplan-Meier methodology. CI, cumulative incidence; HSCT, hematopoietic stem cell transplant; RFS, relapse-free survival

**Supplemental figure 4: Stringent EFS probability.** Stringent EFS was analyzed using

Kaplan-Meier methodology. Stringent EFS considers relapse, death, secondary allograft, and secondary malignancy as events. EFS, event-free survival; HSCT, hematopoietic stem cell transplant.

Supplemental Figure 1

A

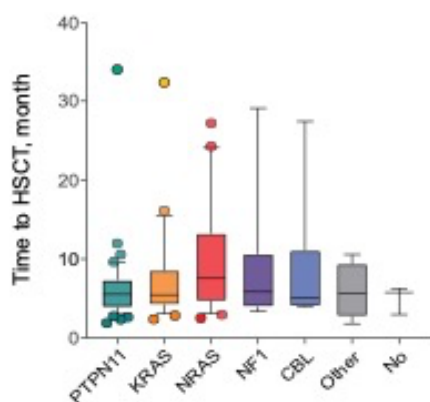

B

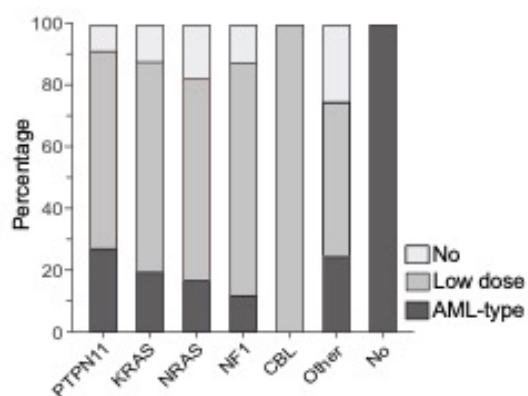

C

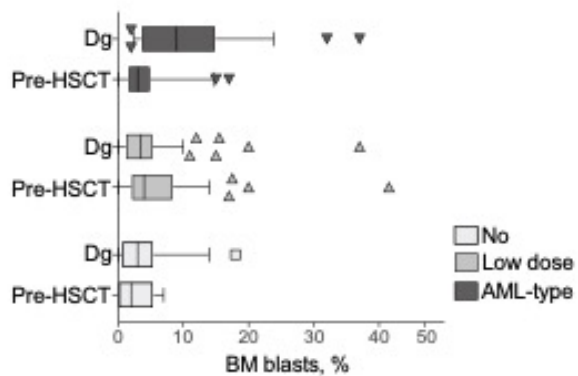

Supplemental Figure 2

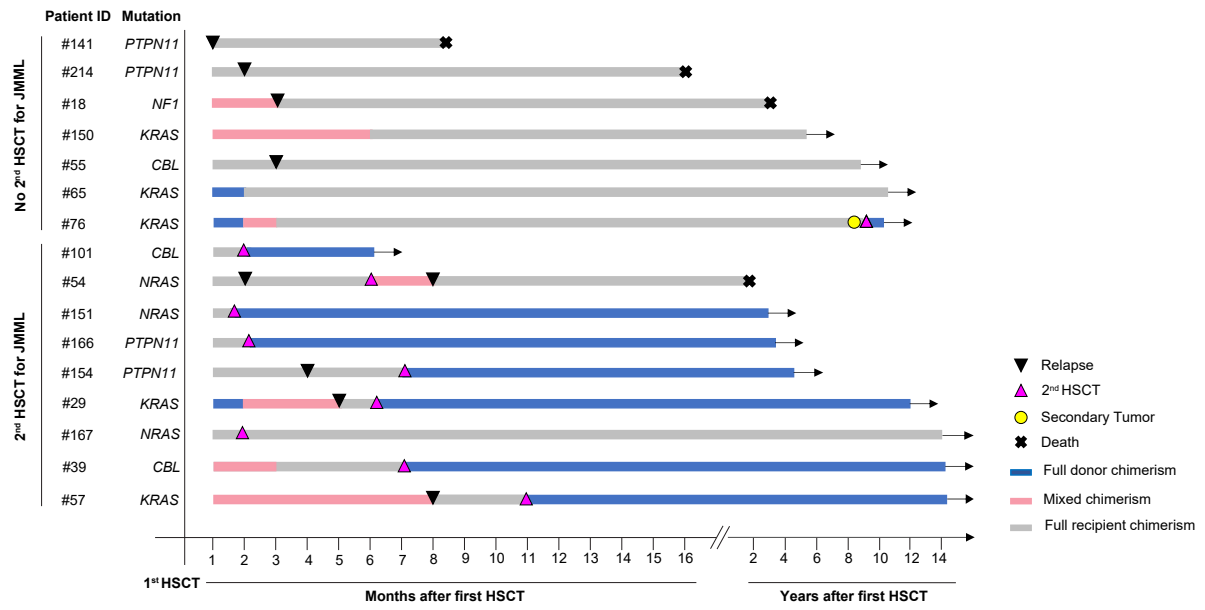



**Supplemental Figure 3**

**A**

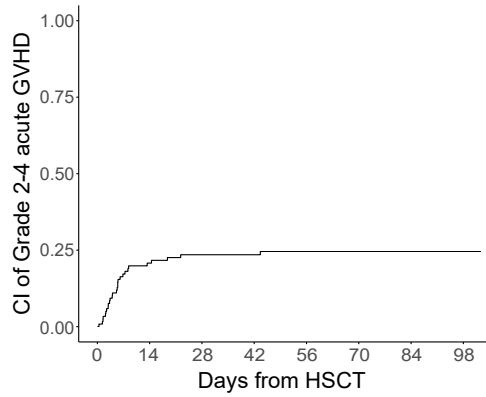

Number at risk  
119 99 73 61 57 54 54 53

**B**

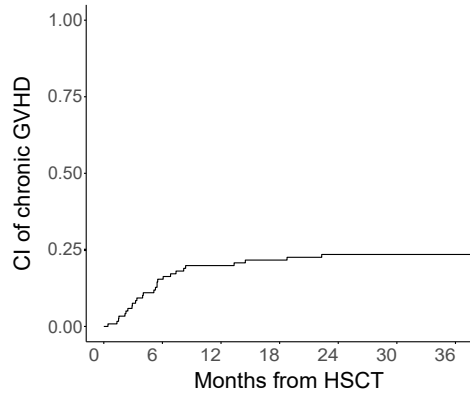

Number at risk  
119 86 66 55 51 45 42

**C**

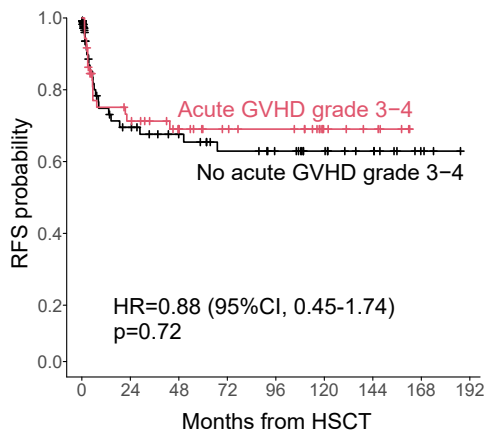

Number at risk  
119 38 31 25 21 15 10 3 0  
0 37 27 20 18 8 5 0 0

**D**

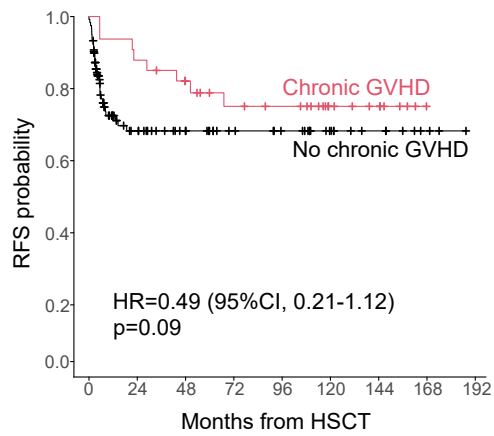

Number at risk  
119 45 33 25 21 13 8 3 0  
34 31 25 20 18 10 7 0 0

Supplemental Figure 4

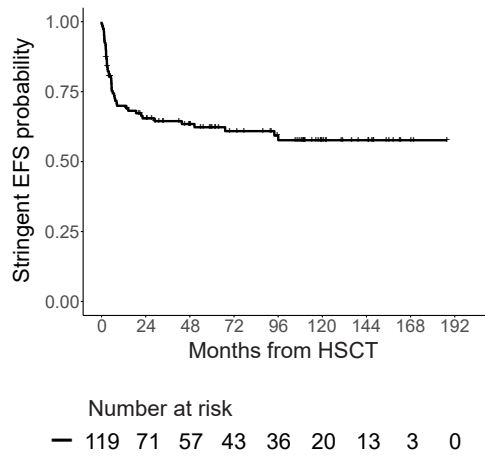

Supplement: 2023_284103_MEYRAN_SUPPL.pdf [file 2023_284103_MEYRAN_SUPPL.pdf]
